# Supplementary material
Source: MDPI journal article supplement (https://www.mdpi.com/2073-4433/13/2/301)
Supplement: s1 [file s1]

# Supplementary Materials: Spatiotemporal Patterns and Regional Transport of Ground-Level Ozone in Major Urban Agglomerations in China

Xiaoyong Liu <sup>1,2</sup>, Chengmei Zhao <sup>1,2</sup>, Jiqiang Niu <sup>1,2,\*</sup>, Fangcheng Su <sup>3</sup>, Dan Yao <sup>4</sup>, Feng Xu <sup>1,2</sup>, Junhui Yan <sup>1,2</sup>, Xinzhi Shen <sup>5</sup> and Tao Jin <sup>5</sup>

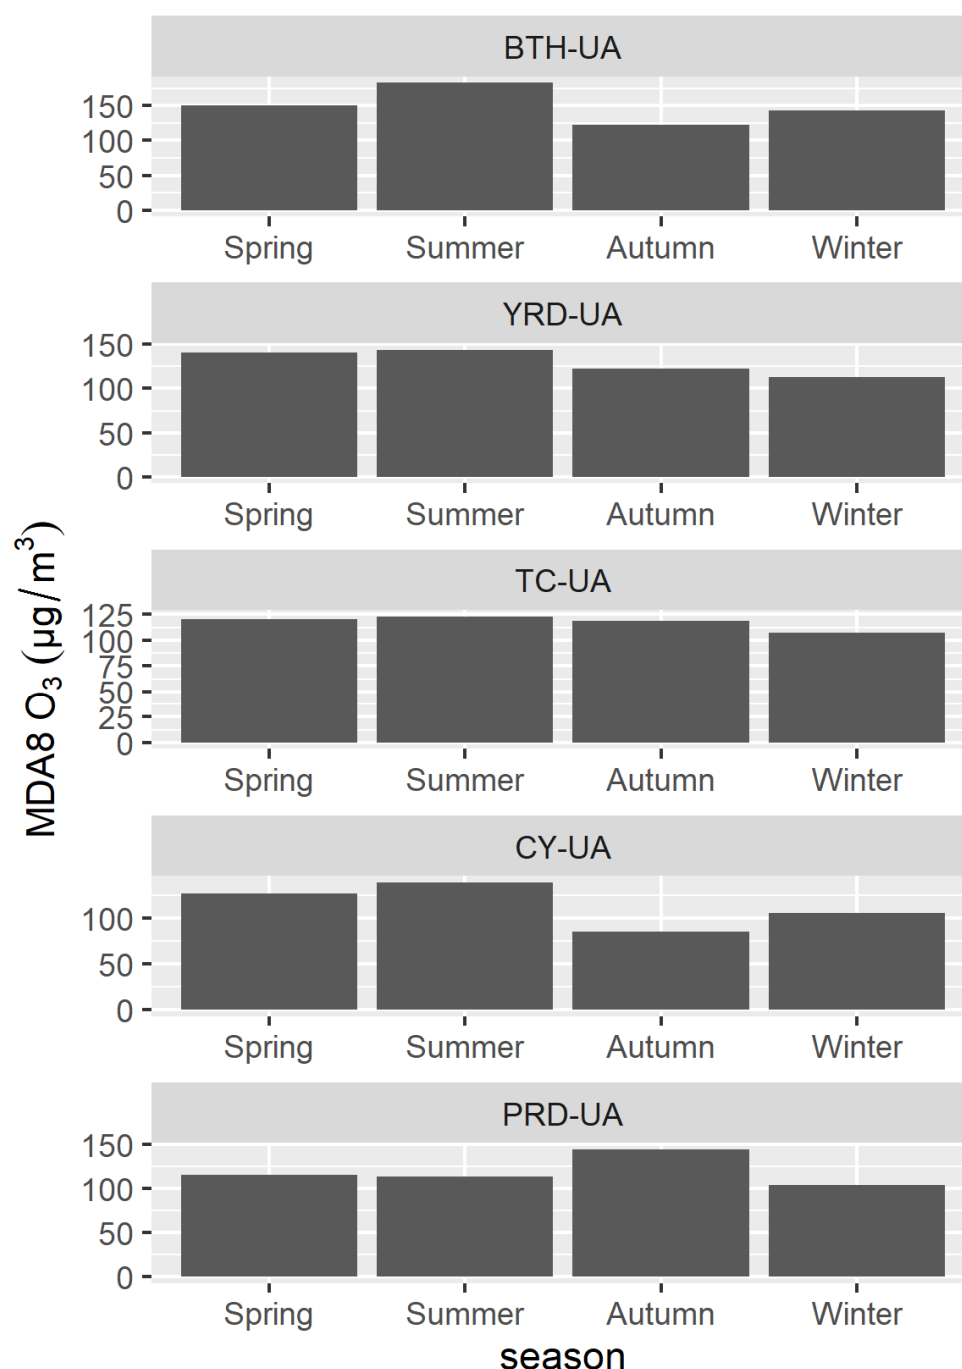

**Figure S1.** Seasonal average values of MDA8 O<sub>3</sub> concentrations in five urban agglomerations in 2017-2020.

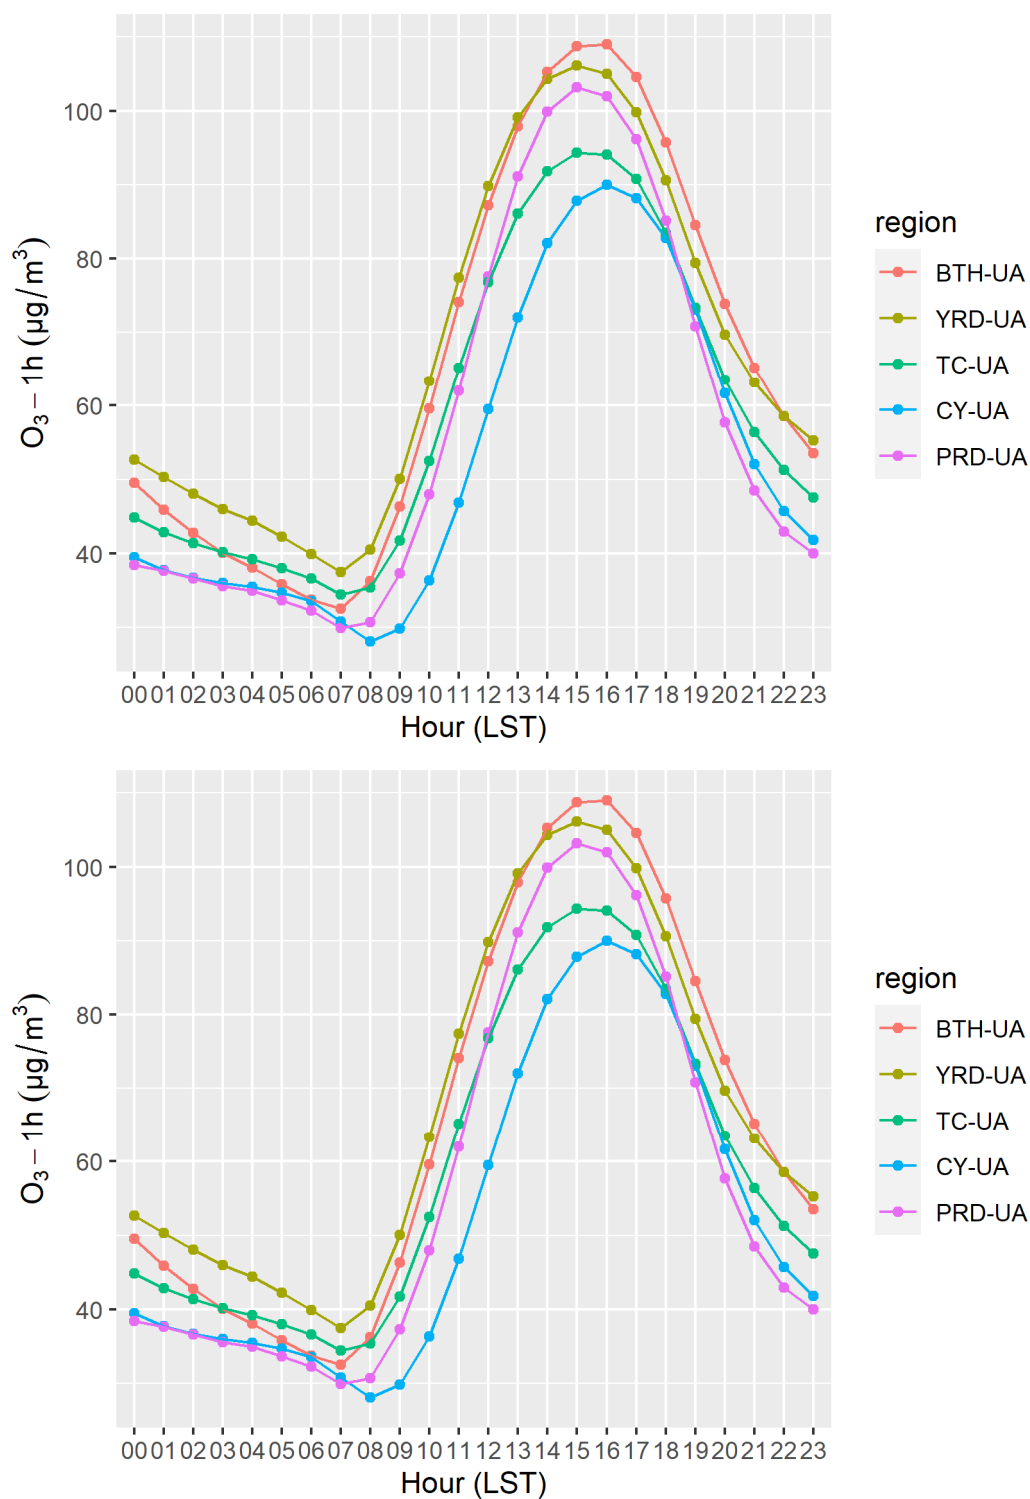

Figure S2. Diurnal variations of  $O_3$  in five regions during 2017–2020.

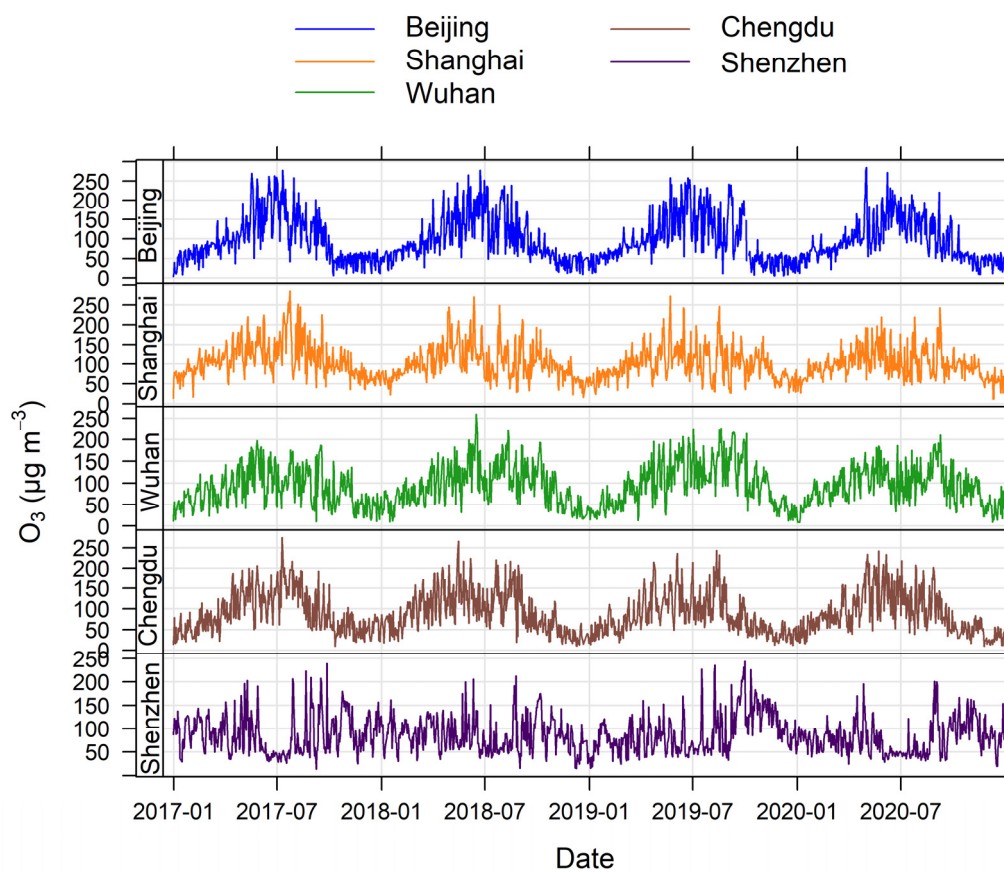

**Figure S3.** The original time series of MDA8 O<sub>3</sub> in five cities.

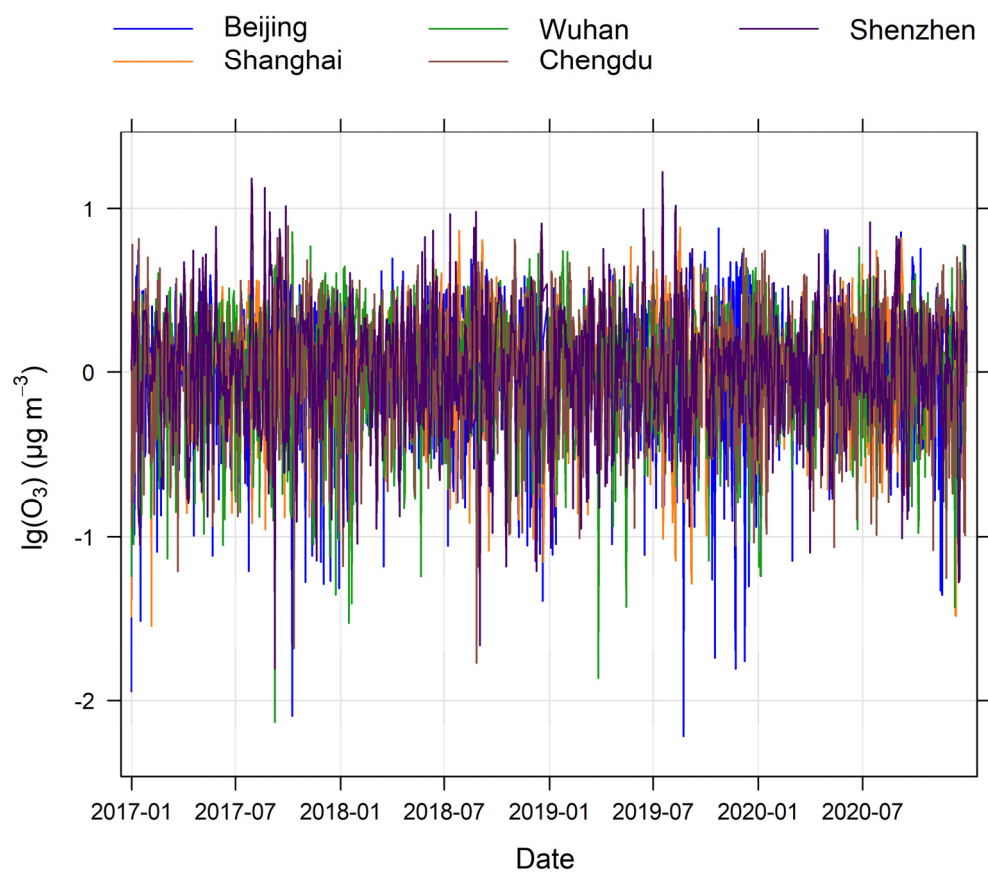

**Figure S4.** The short-term components of MDA8 O<sub>3</sub> decomposed by KZ filter in five cities.

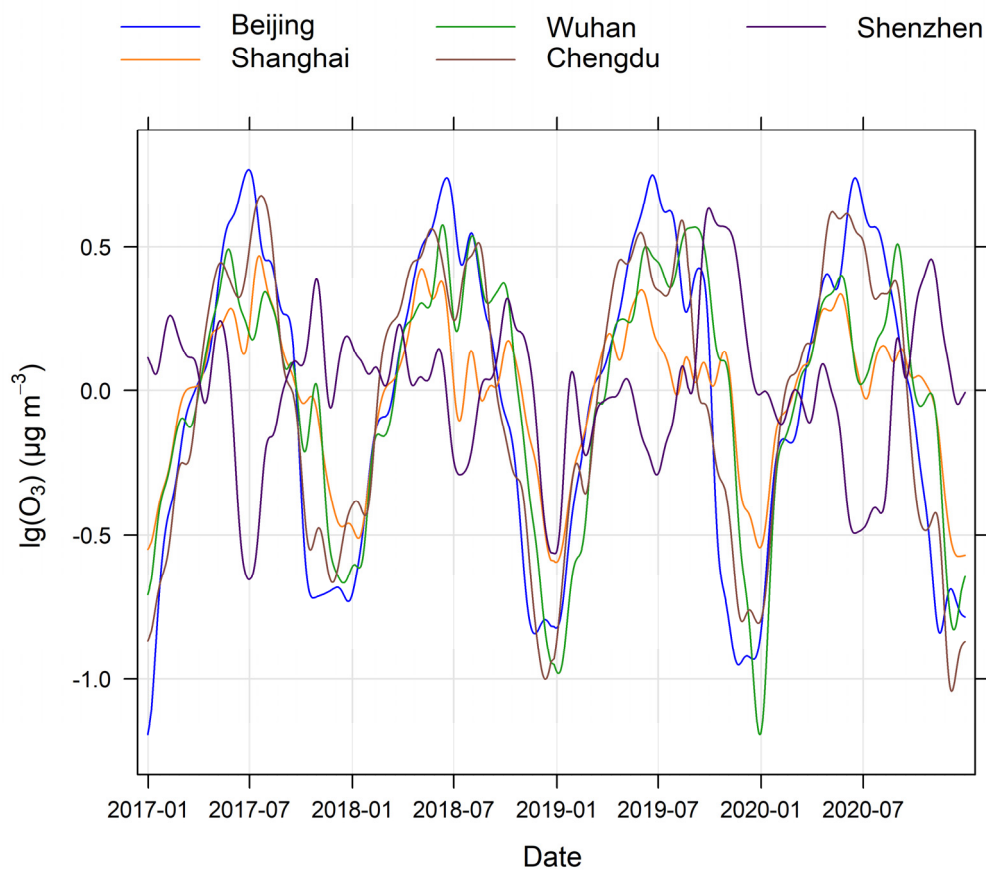

**Figure S5.** The seasonal components of MDA8 O<sub>3</sub> decomposed by KZ filter in five cities.

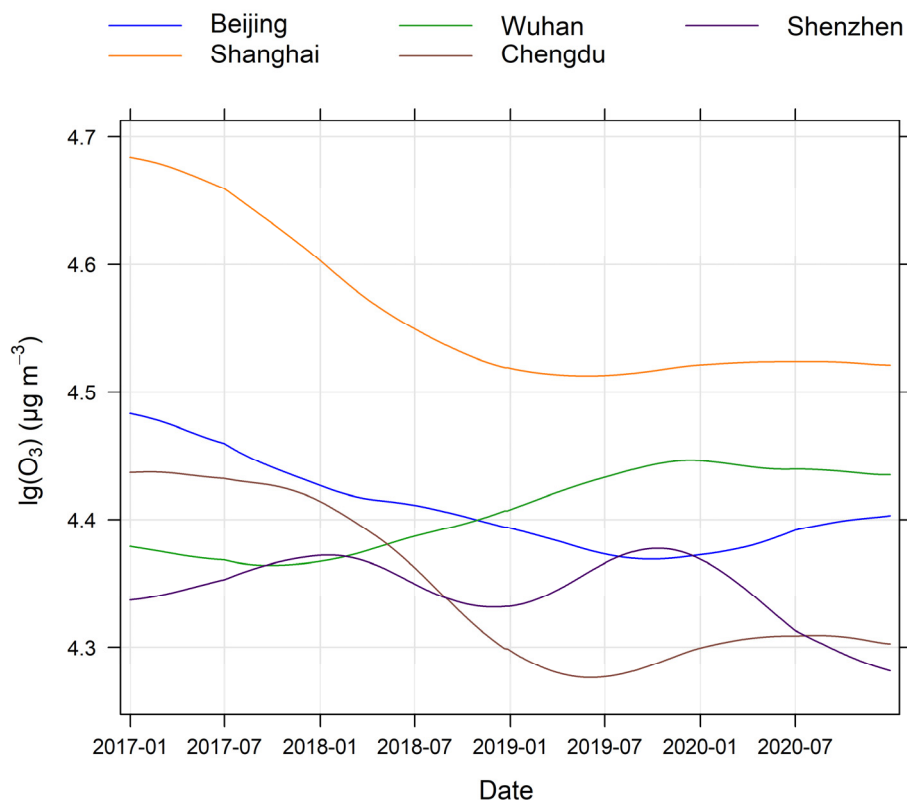

**Figure S6.** The long-term components of MDA8 O<sub>3</sub> decomposed by KZ filter in five cities.

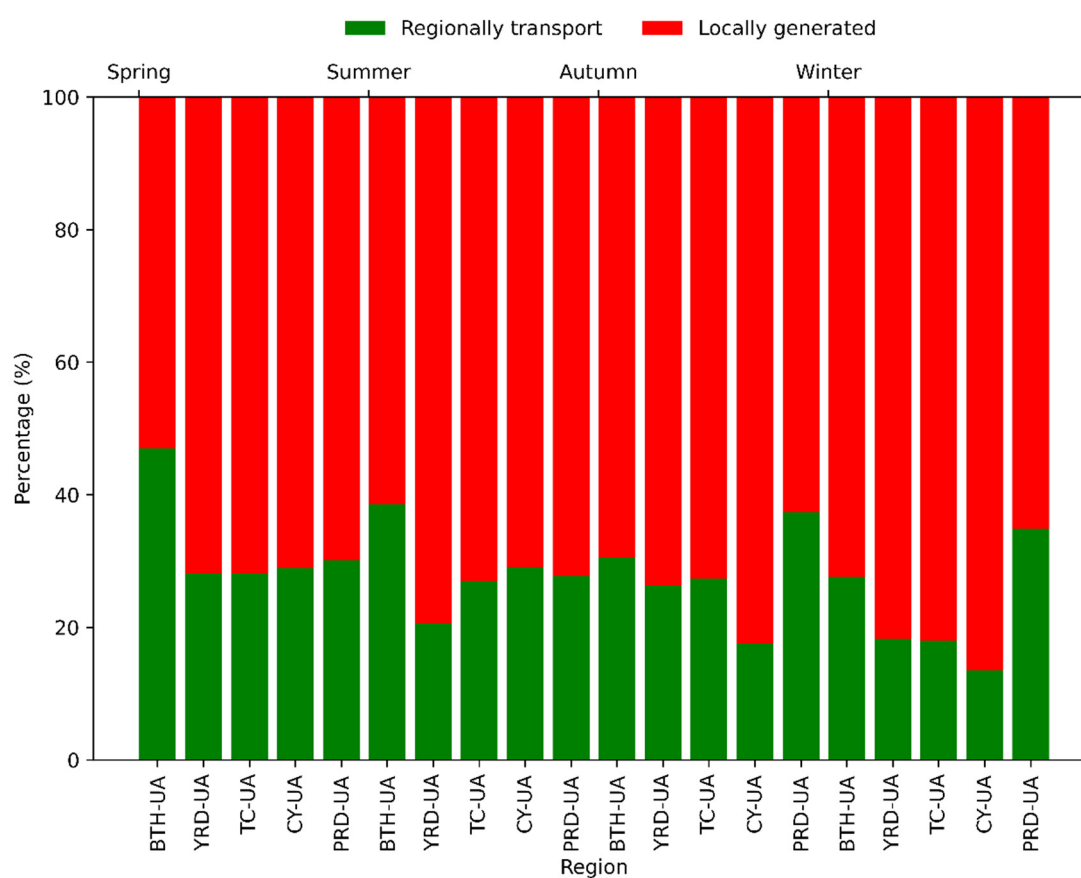

**Figure S7.** The estimated regional contributions of O<sub>3</sub> in different seasons in five urban agglomerations during 2017–2020 by the TCEQ method.

**Table S1.** Parameters of standard deviation ellipse in five urban agglomerations during 2017–2020.

| Region | Parameters           | Year                 |                      |                      |                      |
|--------|----------------------|----------------------|----------------------|----------------------|----------------------|
|        |                      | 2017                 | 2018                 | 2019                 | 2020                 |
| BTH-UA | azimuth/degree       | 56.37                | 56.17                | 56.64                | 57.32                |
|        | mean center          | 116.36°E,<br>39.06°N | 116.40°E,<br>39.09°N | 116.41°E,<br>39.06°N | 116.48°E,<br>39.09°N |
|        | major axes/km        | 448.3                | 448.8                | 453.6                | 450.1                |
|        | minor axes/km        | 232.6                | 233.4                | 228.5                | 228.3                |
|        | area/km <sup>2</sup> | 81868                | 82251                | 81379                | 80681                |
| YRD-UA | azimuth/degree       | 130.15               | 130.23               | 130.24               | 130.74               |
|        | mean center          | 119.12°E,<br>31.67°N | 119.10°E,<br>31.69°N | 119.09°E,<br>31.65°N | 119.11°E,<br>31.68°N |
|        | major axes/km        | 556.1                | 549.3                | 547.7                | 560.0                |
|        | minor axes/km        | 311.5                | 313.0                | 315.8                | 314.3                |
|        | area/km <sup>2</sup> | 136048               | 135032               | 135823               | 138210               |
| TC-UA  | azimuth/degree       | 99.42                | 99.97                | 100.41               | 99.54                |
|        | mean center          | 114.01°E,<br>28.99°N | 114.06°E,<br>29.03°N | 114.03°E,<br>29.0°N  | 114.11°E,<br>28.98°N |
|        | major axes/km        | 481.3                | 471.4                | 472.9                | 480.7                |
|        | minor axes/km        | 393.3                | 396.9                | 395.9                | 393.6                |
|        | area/km <sup>2</sup> | 148657               | 146944               | 147009               | 148601               |
| CY-UA  | azimuth/degree       | 87.48                | 86.86                | 86.67                | 88.65                |
|        | mean center          | 105.22°E,<br>30.05°N | 105.24°E,<br>30.07°N | 105.27°E,<br>30.07°N | 105.20°E,<br>30.06°N |

|        |                      |                      |                      |                      |                      |
|--------|----------------------|----------------------|----------------------|----------------------|----------------------|
|        | major axes/km        | 322.8                | 325.5                | 328.3                | 326.1                |
|        | minor axes/km        | 236.9                | 239.2                | 239.9                | 240.4                |
|        | area/km <sup>2</sup> | 60075                | 61147                | 61852                | 61560                |
|        | azimuth/degree       | 101.81               | 101.34               | 102.06               | 101.47               |
| PRD-UA | mean center          | 113.49°E,<br>22.84°N | 113.49°E,<br>22.85°N | 113.50°E,<br>22.84°N | 113.50°E,<br>22.85°N |
|        | major axes/km        | 156.6                | 155.9                | 156.0                | 154.9                |
|        | minor axes/km        | 87.6                 | 88.1                 | 87.1                 | 88.4                 |
|        | area/km <sup>2</sup> | 10781                | 10784                | 10671                | 10753                |
|        |                      |                      |                      |                      |                      |

**Table S2.** Variances of different MDA8 O<sub>3</sub> components decomposed by KZ filter in five cities.

| City     | D(O)  | D(W)  | D(S)  | D(e)  |
|----------|-------|-------|-------|-------|
| Beijing  | 0.462 | 0.162 | 0.279 | 0.001 |
| Shanghai | 0.186 | 0.104 | 0.067 | 0.003 |
| Wuhan    | 0.351 | 0.153 | 0.175 | 0.001 |
| Chengdu  | 0.393 | 0.146 | 0.224 | 0.004 |
| Shenzhen | 0.224 | 0.140 | 0.063 | 0.001 |
